1 **Easily adaptable head-free training system of macaques for tasks**  
2 **requiring precise measurements of eye position**

3  
4

5 Katsuhisa Kawaguchi<sup>1,2</sup>, Paria Pourriahi<sup>2</sup>, Lenka Seillier<sup>2</sup>, Stephane Clery<sup>2</sup>, Hendrikje Nienborg<sup>2,\*</sup>

6  
7

8 <sup>1</sup> Graduate School of Neural and Behavioural Sciences, International Max Planck Research School,  
9 72074 Tuebingen, Germany

10 <sup>2</sup> University of Tuebingen, Werner Reichardt Centre for Integrative Neuroscience, 72076 Tuebingen,  
11 Germany

12  
13

14 \*correspondence should be addressed to: [hendrikje.nienborg@cin.uni-tuebingen.de](mailto:hendrikje.nienborg@cin.uni-tuebingen.de)

15  
16

17

18 **Highlights**

- 19 • We developed an approach to train macaque monkeys head-free on visuomotor tasks  
20 requiring measurements of eye position
- 21 • The setup is inexpensive, easy to build, and readily adjusted to the animal without the need  
22 for sedation
- 23 • The system was tested for training on a visual fixation and a visual discrimination task
- 24 • Eye measurements (fixation precision, pupil size, microsaccades) were comparable to those  
25 from head-fixed animals

26  
27

28 **Keywords:**

29 Head-free, non-invasive, macaque monkey, eye tracking, behavioral training, microsaccades,  
30 pupil size, 3Rs

31 **Abstract**

32 **We describe a modified system for training macaque monkeys without invasive head**  
33 **immobilization on visuomotor tasks requiring the control of eye-movements. The system**  
34 **combines a conventional primate chair, a chair-mounted infrared camera for measuring**  
35 **eye-movements and a custom-made concave reward-delivery spout firmly attached to**  
36 **the chair. The animal was seated head-free inside the chair but the concavity of the spout**  
37 **stabilized its head during task performance. Training on visual fixation and**  
38 **discrimination tasks was successfully performed with this system. Eye-measurements,**  
39 **such as fixation-precision, pupil size as well as micro-saccades were comparable to**  
40 **those obtained using conventional invasive head-fixation methods. The system is**  
41 **inexpensive (~\$40 USD material cost), easy to fabricate in a workshop (technical**  
42 **drawings are included), and readily adjustable between animals without the need to**  
43 **immobilize or sedate them for these adjustments.**

44

45

46 1. Introduction

47 Basic systems neuroscience research of cognitive behavior, such as attention, perception and  
48 decision-making, often rely on awake macaque monkeys (Roelfsema and Treue, 2014)  
49 performing visuomotor tasks. Animals in such studies are frequently trained extensively prior to  
50 data acquisition, and many tasks require tight control of the animals' eye movements (e.g.  
51 (Clery et al., 2017)). For precise measurements of eye position the animals' heads are typically  
52 fixed to a primate chair using head-posts surgically implanted to the animal's skull (e.g. (Adams  
53 et al., 2007; Betelak et al., 2001)). To begin the animal's training using such approaches  
54 therefore requires an invasive head-post implantation, and frequently several weeks to months  
55 post-surgically for healing and successful osseointegration of the implant into the skull (Betelak  
56 et al., 2001) to ensure good stability.

57

58 An approach to allow for head-free training without the need for a surgery is therefore desirable  
59 not only as a refinement of research with animals from an animal welfare perspective (e.g.  
60 (Prescott et al., 2010)), but also because of its potential to accelerate the training procedure, e.g.  
61 by taking advantage of the period required for osseointegration for behavioral training. Previous  
62 advances with the same goal used molds, helmets or masks covering the animal's face  
63 (Amemori et al., 2015; De Luna et al., 2014; Drucker et al., 2015; Fairhall et al., 2006; Machado

64 and Nelson, 2011; Slater et al., 2016), which were individually tailored to the animals under  
65 sedation. Other approaches using transport-boxes of smaller rhesus and new-world monkeys  
66 monitored spontaneous gaze direction to natural images in the absence of operant conditioning  
67 (Ryan et al., 2019). We focus here on a non-invasive training systems in combination with a  
68 primate chair to ease integration into conventional set-ups using head-fixation. We developed a  
69 system that is sufficiently flexible that it only requires coarse measurements of the animal's face,  
70 which can be obtained from an animal while seated in a primate chair. The system is integrated  
71 in a standard primate chair combined with a commercial eye-tracker. It is inexpensive and  
72 simple to build in a standard machine shop (material cost ~\$40USD). We show training data  
73 from a visual fixation and discrimination task in one animal as well as detailed measurements of  
74 eye movements and pupil size, which were comparable to those obtained from the same animal  
75 under head-fixation and two additional head-fixed animals. Because of its flexibility and  
76 simplicity the system has the potential to be more widely adapted.

77

## 78 2. Methods

### 79 2.1. *Design of the reward spout for head-free training*

80 To train the animal without head-fixation, we used a custom-made concavely shaped reward  
81 spout mounted firmly to the chair (schematics and technical drawings in Fig. 1a and c-f,  
82 respectively). It consisted of an engineering thermoplastic (copolymer polyoxymethylene,  
83 POM-c, "Delrin", DuPont) milled to a concave cone whose base pointed towards the animal and  
84 in whose center a reward tube (OD 4mm, ID 2mm) was inserted and secured with a screw (Fig.  
85 1 c, red arrow). The thermoplastic material was chosen for its sturdiness without being brittle to  
86 withstand the animal's attempts to bite into the rim of the concavity. A wide slit in the downward  
87 facing side of the cone ensured that no liquid accumulated inside the concavity of the spout.  
88 The blunt top of the cone transitioned to a solid cylindrical part (Fig. 1c). Both conical and  
89 cylindrical component were milled in one piece. The depth and diameter of the cone was  
90 chosen such that a) it reduced the range of possible head positions from which rewards could  
91 be sampled and b) no shadows were cast on the eye to allow for good quality monocular eye-  
92 signals. Note that while we designed this spout to approximately match the ventral-dorsal extent  
93 (3-4 cm) and width of the upper jaw (4-5 cm) of the animal, our measurements were coarse and  
94 did not seem critical. Indeed, we also initially tried a substantially longer spout (87.1 mm instead  
95 of 66.9 mm, cf. Fig. 1c), which allowed for overall satisfactory measurements of eye signals  
96 although it was more prone to cast shadows on the animal's eye and hence not used further.

97 Moreover, small adjustments could be made by changing the distance by which the reward tube  
98 protruded from the bottom of the concavity inside the reward spout. The conical design of the  
99 spout in our system was done for convenience of the milling in the manufacturing process.  
100 Given the ease to obtain good eye signals with this design there was no need to further refine  
101 the shape of the spout. But if, e.g. shadows from the spout led to deteriorated signal quality a  
102 narrower shape better tailored to the bridge the noise (resulting in a more triangular cross-  
103 section of the spout) could be considered.

104

105 The cylindrical part of the spout was screwed to two aluminum rods (OD 10mm), one on each  
106 side (Fig. 1e, “front rods”). Note that the spout had to be tightly screwed to the rods to ensure  
107 that the monkey could not rotate the spout around the axis of the aluminum rods. These rods  
108 (oriented parallel to the front of the primate chair) were then mounted via aluminum cross-  
109 connectors (Fig. 1e) to two aluminum rods (OD 10mm, Fig. 1e, “side rods”) that were mounted  
110 to the vertical walls of the chair (see Fig. 1b, oriented parallel to the sides of the chair) via  
111 aluminum clamps (Fig. 1c). These latter rods remained mounted to the chair between training  
112 sessions, while the former and the reward spout were removed between sessions. Only the  
113 screws in the cross-connectors (red arrows in Fig. 1b) positioned outside the reach of the  
114 animal’s mouth to ensure the experimenter’s safety, therefore needed to be tightened while the  
115 animal was seated in the chair. Material cost for all custom-made components was  
116 approximately \$40 USD.

117

## 118 *2.2. Measurements of eye-movements and pupil size*

119 The animal’s eye position and pupil size were monocularly measured at 500Hz using an infrared  
120 video-based eye tracker (Eyelink 1000, SR Research Ltd, Canada), in the centroid-fitting, pupil-  
121 CR (corneal-reflex) and the head-referenced coordinates (HREF) mode. The eye-signals (x  
122 position, y position and pupil size) were digitized and stored for the subsequent offline analysis.  
123 The eye tracker was mounted in a fixed position on the primate chair (see section 2.3) to  
124 minimize variability of the measurements between sessions. For each day’s experiment, we  
125 calibrated the eye-tracker by applying a linear transformation (gain and offset) to the raw eye-  
126 position signal. This calibration procedure required the animal to fixate at 5 fixation dots (one  
127 towards each corner of the screen, 6.6° eccentricity, as well as in the center) sequentially  
128 appearing in randomized positions on the monitor. Since the calibration procedure is only  
129 possible in animals trained to fixate, we used gain-values obtained from a previously trained

130 animal and manually adjusted the offsets in the initial four fixation training sessions. Our  
131 analysis of eye-data focused on the period of animals' fixation in which the gaze angles were  
132 constant.

133

### 134 2.3. *Camera mount to the chair*

135 To allow for easy daily mounting of the infrared camera in a consistent position without  
136 extensive re-calibration we firmly attached an inverted L-shaped mount (aluminum profile) to the  
137 primate chair (Crist, Fig. 2b). A custom-made base replaced the commercial base of the camera  
138 ("desktop mount model"), and could be easily attached to the horizontal arm of the base. A  
139 stopper on the horizontal arm of the base ensured that the camera was mounted in the same  
140 position on a daily basis, requiring only minimal refocus to ensure good image quality.

141

### 142 2.4. *Animal subjects*

143 This study was approved by the local authorities (Regierungspraesidium Tübingen). We  
144 collected data from three male rhesus monkeys, A, M and K (*Macaca mulatta*; K: 6.5kg, M: 8kg  
145 and A: 12kg) performing a standard visual fixation task (monkey M and K only under head-  
146 fixation and monkey A both head-free and under head-fixation), an orientation discrimination  
147 task (monkey A) and a disparity discrimination task (all three monkeys under head-fixation). The  
148 monkeys were implanted under general anesthesia with a titanium head-post base on their skull,  
149 under their skin, and we developed this head-free training system to take advantage of the post-  
150 surgical period for osseointegration in animal A. He was naïve to any behavioral training in a  
151 laboratory setting except for climbing into a standard primate chair. After the animal was trained  
152 using the head-free system, a metal holder was screwed into the titanium base of the head-  
153 holder to allow for conventional head-fixation.

154

### 155 2.5. *Behavioral training*

156 While monkey M and K received conventional fixation training under head-fixation, monkey A  
157 was initially trained using the head-free system. First, he was habituated to the spout of our  
158 system and the reward delivery (four sessions). He was then trained on a standard visual  
159 fixation task by gradually increasing the fixation duration. We here analyzed the results of all 46  
160 sessions of the fixation training in this animal. Following the fixation training we initiated training  
161 on an orientation discrimination task. We initially used the contrast of the distractor target as an

162 additional cue and report here the initial 16 sessions during which both targets were at full  
163 contrast such that the only cue the animal could use was the stimulus orientation.

#### 164 *2.5.1 Visual fixation task*

165 The monkeys were required to fixate within a window around the fixation dot  $0.1^\circ$  dva in the  
166 center of the monitor to receive juice or water rewards. During the initial training sessions we  
167 progressively increased the fixation duration until it reached 2 sec. Once the animals could  
168 reliably fixate for 2 sec, we started to present a peripheral visual stimulus (typically a drifting  
169 luminance grating) on the screen.

170

#### 171 *2.5.2. Orientation discrimination task*

172 After animal A learned to maintain stable fixation using the head-free system, we began to train  
173 him on a two-alternate forced-choice (2AFC) orientation discrimination task, similar to (Nienborg  
174 and Cumming, 2014). Once the animal acquired fixation the stimulus appeared (typically for 2  
175 sec), as well as two choice targets, a horizontally and vertically oriented Gabor, respectively,  
176 presented above and below the fixation marker. The vertical position of the choice target was  
177 randomized. Once the central fixation marker disappeared the animal was allowed to make his  
178 saccade indicating the choice. A saccade to the target whose orientation matched that of the  
179 stimulus was rewarded. To discourage the animal from guessing, the available reward size was  
180 increased based on his task performance. After three consecutive trials with correct choices, the  
181 available reward size was doubled compared to the original reward size. After four consecutive  
182 trials with correct choices, the available reward size was again doubled (quadruple compared to  
183 the original size) and remained at this size until the next error. After every error trial, the  
184 available reward size was reset to the original. For the analyses in Fig. 6b “large available  
185 reward” trials refer to both intermediate and large available reward trials collapsed to  
186 approximately equalize the number of trials to the small available reward trials.

187

#### 188 *2.4. Visual stimuli*

189 Visual stimuli (luminance linearized) were back-projected on a screen by two projection design  
190 projectors (F21 DLP; 60Hz; 1920 x 1080 pixel resolution,  $225 \text{ cd/m}^2$  mean luminance) at a  
191 viewing distance of 149 cm (Animal A) or 97.5 (Animal K), or using a DLP LED Propixx  
192 projector (ViewPixx; run at 100 Hz 1920!1080 pixel resolution,  $30 \text{ cd/m}^2$  mean luminance) and  
193 an active circular polarizer (Depth Q; 200 Hz) for Animal M (viewing distance 101 cm). Stimuli  
194 were generated with custom written software using MATLAB (Mathworks, USA) based on the

195 psychophysics toolbox (Brainard, 1997; Pelli, 1997; Kleiner et al., 2007). For the visual fixation  
196 training we used the same set of stimuli as previously described (Seillier et al., 2017), i.e.  
197 circular drifting sinusoidal luminance gratings of varying temporal, spatial frequency, contrast  
198 and size, randomly interleaved with blank stimuli.

199 In the orientation discrimination task, the stimuli were 2D Gabor whose orientation and phase  
200 was randomly changed on each video-frame (60Hz). Orientation signal strength on each trial  
201 was determined according to the probability mass distribution set for the stimulus, analogously  
202 to (Nienborg and Cumming, 2009) but in the orientation domain. For the 0% signal stimulus the  
203 orientation was drawn from a uniform distribution (8 equally-spaced values between 22.5° and  
204 180°). The monkeys were rewarded randomly on half of the trials on the 0% signal trials. These  
205 0% signal trials were randomly interleaved with horizontal or vertical orientation signal trials. The  
206 range of signal strengths was adjusted between sessions to manipulate task difficulty and  
207 encourage performance at psychophysical threshold. Typical added signal values were 25%,  
208 50% and 100%.

209

## 210 2.5. Analysis

211 All analyses were performed using Matlab or Python3.

212

### 213 2.5.1 Psychometric threshold

214 The animal's choice-behaviors in the orientation discrimination task was summarized as a  
215 psychometric function by plotting the probability of 'vertical' choices as a function of the signed  
216 signal strength  $x$  and then fitted with a cumulative Gaussian function by maximum likelihood  
217 estimation using the `fminsearch` function in Matlab:

$$P(\text{choose vertical target}) = \frac{1}{2} \left[ 1 + \operatorname{erf} \left( \frac{x - \mu}{\sigma\sqrt{2}} \right) \right]$$

218 where *erf* denotes the error function, and  $\mu$  and  $\sigma$  are the mean and standard deviation of the  
219 fitted cumulative Gaussian distribution, respectively. The standard deviation  $\sigma$  was defined as  
220 the psychophysical threshold and corresponds to the 84% correct level.

221

### 222 2.5.3 Preprocessing of eye traces

223 We transformed the eye position  $x$  to velocity  $v$ , which represented a moving average of  
224 velocities over 5 data samples (Engbert and Kliegl, 2003):

$$v_n = \frac{x_{n+2} + x_{n+1} - x_{n-1} - x_{n-2}}{6\Delta t}$$

225 where  $\Delta t$  corresponds to 1/sampling rate. Eye position values were reconstructed using these  
226 velocity values to suppress noise (Engbert and Mergenthaler, 2006):

$$x_n = x_0 + \Delta t \sum_{i=1}^n v_n$$

227

228 We used the reconstructed eye position for our analyses, where  $x_0$  is the initial eye position in  
229 each session.

230

#### 231 *2.5.4 Fixation precision*

232 To quantify the fixation quality of the head-free monkey, we computed the variance of the  
233 horizontal and vertical eye positions separately. In addition, we computed fixation precision in  
234 each session as the fixation span: the area around the mean eye-position during fixation, where  
235 the line of sight is found with probability  $p$  (Cherici et al., 2012). In this analysis we only included  
236 trials with successful fixation (typically 2 sec fixation duration). To examine within-trial fixation  
237 precision we subtracted the mean eye-position during the fixation period from the eye-position  
238 values on each trial. Conversely, to analyze across-trial fixation precision we computed the  
239 mean eye position on each trial. We then pooled these eye-position values across all the  
240 completed trials in each session and estimated the 2D probability density function by making 2D  
241 histograms on a grid covering the entire area of fixation using the Matlab *ndhist* function. Based  
242 on this probability density function, we define the area corresponding to the central 75% of the  
243 distribution, as the fixation precision (compare (Cherici et al., 2012)).

244

#### 245 *2.5.5 Pupil size*

246 Pupil size measurements were z-scored and band-pass filtered as previously described  
247 (Kawaguchi et al., 2018). To compare pupil size across sessions, the band-pass filtered pupil  
248 size was z-scored using the mean and standard deviation (SD) of the pupil size during the  
249 stimulus presentation period across all completed trials within each session. On average the  
250 pupil size time-course showed a constriction after the stimulus onset followed by a slow dilation  
251 towards the stimulus offset (example in Fig. 6a). To compare the difference in the pupil size  
252 between large and small available reward trials, we computed the average pupil size during the  
253 250ms prior to stimulus offset, to compare it to the metric we previously used in head-fixed  
254 animals (Kawaguchi et al., 2018). This analysis was restricted to 0% signal trials to exclude



255 potential effects of signal strength on the pupil size analogous to the analysis in (Kawaguchi et  
256 al., 2018).

257

258

### 259 *2.5.6 Microsaccades*

260 We used a recently developed microsaccade detection algorithm using a convolutional neural  
261 network (<https://github.com/berenslab/uneeye>; (Bellet et al., 2019)). We used the pretrained  
262 weights obtained in the original study based on multiple datasets to detect the microsaccades in  
263 the head-free animal during the stimulus presentation period. We examined whether the  
264 detected microsaccades obeyed the characteristic linear relationship between saccadic peak  
265 velocity and amplitude (Zuber et al., 1965), and compared them to microsaccades measured  
266 under head-fixation in the same and two additional animals while they performed the analogous  
267 task to the orientation discrimination described here in the disparity domain, (see (Kawaguchi et  
268 al., 2018; Lueckmann et al., 2018)).

269

## 270 3. Results

### 271 *3.1 Training on a standard visual fixation task*

272 We devised this head-free training system to train animals prior to any surgery and to take  
273 advantage of the post-surgical period (3-6 months, (Betelak et al., 2001)) aimed at ensuring  
274 successful osseointegration of the base-part of a two-part head-fixation implant (Fig. 2a).

275

276 We tested this system in one male animal (A) naive to any behavioral training other than to  
277 enter the primate chair. The animal was seated in a standard primate chair and trained via  
278 operant conditioning to stabilize his head in a fixed position to receive fluid rewards (Fig. 2b, left).  
279 Although the animal could move his head freely, the concavity of the reward-spout reduced the  
280 variability of the head position whenever he was seeking rewards (Fig. 2b, right) to allow for  
281 reliable measurements of monocular eye-position. After four sessions of habituation to the  
282 reward spout we were able to start monitoring the animal's eye position using the chair-mounted  
283 video-based eye-tracker during a standard visual fixation task. Example measured eye traces  
284 and pupil size are shown in Fig. 2c. Using this head-free system, the monkey was able to fixate  
285 successfully for 2 sec within 6 training session, which was somewhat shorter than the number of  
286 sessions required in two other animals using conventional head-fixation (13 and 28 sessions in  
287 animal M and K, respectively, Fig. 3b). In session seven, following the animal A's reliable ability

288 to fixate for 2 sec we began to simultaneously present a visual stimulus peripherally during the  
289 fixation period. Starting in session eight, we could reduce the size of the fixation window width  
290 and height to below  $2.5^\circ \times 2.5^\circ$  (Fig. 3c). These increased fixation requirements resulted in a  
291 relatively stable proportion of fixation breaks across sessions (Fig. 3d), while the animal worked  
292 for increasingly longer sessions over the course of training (Fig. 3e).

293 To examine the quality of the eye-position measurements using this system, we quantified the  
294 fixation precision as the variance of eye position (Fig. 4a) and fixation span (Cherici et al., 2012)  
295 both within (Fig. 4b) and across (Fig. 4c) trials. We observed that these values improved over  
296 the course of training (Spearman's rank correlation with session number; 4b:  $r = -0.59$ ,  $p < 10^{-4}$   
297 4c  $r = -0.76$ ,  $p < 10^{-8}$ ). After about 30 sessions the fixation precision reached values that  
298 approached those obtained for fully trained animals under head-fixation (Fig. 4b, c, right). This  
299 shows that comparable fixation precision can be reached in our head-free system to that with  
300 conventional head-fixation using implanted head-posts.

301

### 302 *3.2. Training on an orientation discrimination task*

303 Once the animal achieved good fixation performance we began to train him on an orientation  
304 discrimination task (see Methods). During this training we gradually increased the contrast of  
305 the incorrect target until the only cue available to the animal to solve the task was the orientation  
306 of the stimulus. Here, we analyzed the initial 16 sessions for which both targets were at full  
307 contrast such that the animal had to rely on the orientation of the stimulus to solve the task (Fig.  
308 5a). The animal indicated his choice via a saccade to one of the two targets. The video-based  
309 eye-tracker captured his choice saccades well (examples from four sessions; Fig. 5b), and the  
310 improvement of the psychometric thresholds (Fig.5c) document the training success  
311 (Spearman's rank correlation with session number  $r = -0.84$ ,  $p < 10^{-4}$ ).

312

### 313 *3.3 Measurements of modulation in pupil size are comparable to those obtained under head-* 314 *fixation*

315 We recently used a pupil-size based metric to infer a number of arousal-linked internal states  
316 (Ebitz and Platt, 2015; Mitz et al., 2017; Rudebeck et al., 2014; Suzuki et al., 2016), and  
317 observed systematic modulation of pupil size with, e.g. available reward size (Kawaguchi et al.,  
318 2018). We therefore wondered whether our measurements of the eye signals in the head-free  
319 system were of sufficient quality to observe such modulation in this task as well. In the task we  
320 used, reward size was changed in a systematic way based on performance (see Methods). We

321 therefore computed the average pupil size in the last 250ms during the stimulus presentation,  
322 (as done for head-fixed animals in (Kawaguchi et al., 2018)), and compared this metric for small  
323 and large available reward trials across the 16 sessions analyzed here. We found that pupil size  
324 was significantly larger in large available reward trials ( $p = 0.011$ ; Wilcoxon signed rank test; Fig.  
325 6b), very similar to our results in head-fixed animals ((Kawaguchi et al., 2018), their Fig. 3e).

326

### 327 *3.4 Measurements of microsaccades are comparable to those obtained under head-fixation*

328 Microsaccades are small fixational eye-movements that have been linked to sensory, motor,  
329 and cognitive processes (Chen and Hafed, 2013; Herrington et al., 2009; Lowet et al., 2018;  
330 McFarland et al., 2015), and are increasingly of interest to cognition research. We therefore  
331 wondered whether our eye-position measurements in the head-free system were of sufficient  
332 precision to detect microsaccades. The raw eye traces indicate that a recently devised algorithm  
333 (Bellet et al., 2019) successfully detected microsaccades using the pretrained weights (see eye  
334 traces from two example trials in Fig. 6a). The rate of microsaccades was comparable to that  
335 obtained under head-fixation (head-free animal A:  $1.14 \pm 0.20 \text{ s}^{-1}$ ; head-fixed animal A:  $1.64 \pm$   
336  $0.19 \text{ s}^{-1}$ ; head-fixed animal M:  $2.19 \pm 0.13 \text{ s}^{-1}$ ; head-fixed animal K:  $1.23 \pm 0.24 \text{ s}^{-1}$ ; mean  $\pm$  SD)  
337 and to values observed in human observers, e.g. (Cherici et al., 2012). Moreover, the  
338 microsaccades showed the characteristic linear relationship between peak velocity and  
339 amplitude (Zuber et al., 1965), which was similar to that obtained under head-fixation in the  
340 same and two additional animals (Pearson correlation:  $r = 0.61$  for 16 sessions,  $0.55$  for 7  
341 sessions in head-free and head-fixed animal A, respectively;  $r=0.70$  in 8 sessions and  $r=0.47$  in  
342 14 sessions in head-fixed animal M and K, respectively;  $p \ll 10^{-10}$  in all cases, Fig. 7b).

343

### 344 *3.5 Transitioning to head-fixation following the head-free training*

345 After a five-month period of training using the head-free system we transitioned animal A to  
346 conventional head-fixation using an implanted head-post. Since the animal had become  
347 accustomed to the voluntary engagement in the task and sometimes rotated his body while  
348 being seated in the chair we were initially concerned that head-fixation might substantially  
349 disrupt his trained visual fixation behavior. But the animal adapted quickly to the head-fixation  
350 and required only 10-15 additional sessions of fixation training (Fig. 4b and c, middle, green  
351 abscissa) to approach the fixation precision of the fully trained animals that only received  
352 fixation training under head-fixation.

353

354 Together, these results show that good quality eye-signal measurements can be obtained with  
355 this head-free system, allowing for the training on sensorimotor tasks, and that an animal  
356 trained head-free can then readily adapt to head fixation.

#### 357 4. Discussion

358 We described a modified non-invasive system to train macaque monkeys without head-fixation.  
359 It has the advantages that, unlike previous non-invasive designs (Amemori et al., 2015; Drucker  
360 et al., 2015; Fairhall et al., 2006; Machado and Nelson, 2011; Slater et al., 2016), it does not  
361 require sedation of the animals for individual customization and is readily fabricated in a  
362 standard workshop. We also performed, for the first time to our knowledge, a detailed analysis  
363 of the animal's eye movements, with a focus on within- and across-trial fixation precision and  
364 microsaccades, and pupil size measurements in the head-free system, and compared these to  
365 the values observed under head-fixation. We found that the eye-measurements in the head-free  
366 animal were overall similar to those obtained under head-fixation in the same animal as well as  
367 in two additional animals. The system allows for animal training during the period for  
368 osseointegration after implantation of a conventional head-post. The comparison of the time-  
369 course of the initial fixation training in one head-free and two head-fixed animals suggests that  
370 the head-free training is not slower than conventional training with head-fixation. It may even  
371 have the advantage to somewhat accelerate the training process, potentially because it allows  
372 for voluntary engagement of the animal in the task, but this would need to be confirmed in a  
373 larger sample of animals.

374

375 An important observation was that the transition between the head-free system to conventional  
376 head-fixation required only minimal re-training, suggesting very little cost in time to employ initial  
377 head-free training even when the animal will ultimately engage in experiments requiring head-  
378 fixation. This observation, together with the simplicity, flexibility and low material cost should  
379 result in a low threshold to adopt this system to more efficiently train the animals as well as  
380 improve animal welfare (Prescott et al., 2010), by refining existing set-ups using video-based  
381 eye tracking. Finally, the quality of the eye measurements, which was comparable to those  
382 obtained under head-fixation, makes the system amenable to combine with neuronal recordings.  
383 These may be a tethered configuration with, e.g. chronically or semi-chronically implanted  
384 electrodes (e.g. (Ruff et al., 2016)), but would require training the animal to tolerate the touch to  
385 the head associated with connecting the cables of the recording system, or wireless recordings  
386 (Yin et al., 2014).



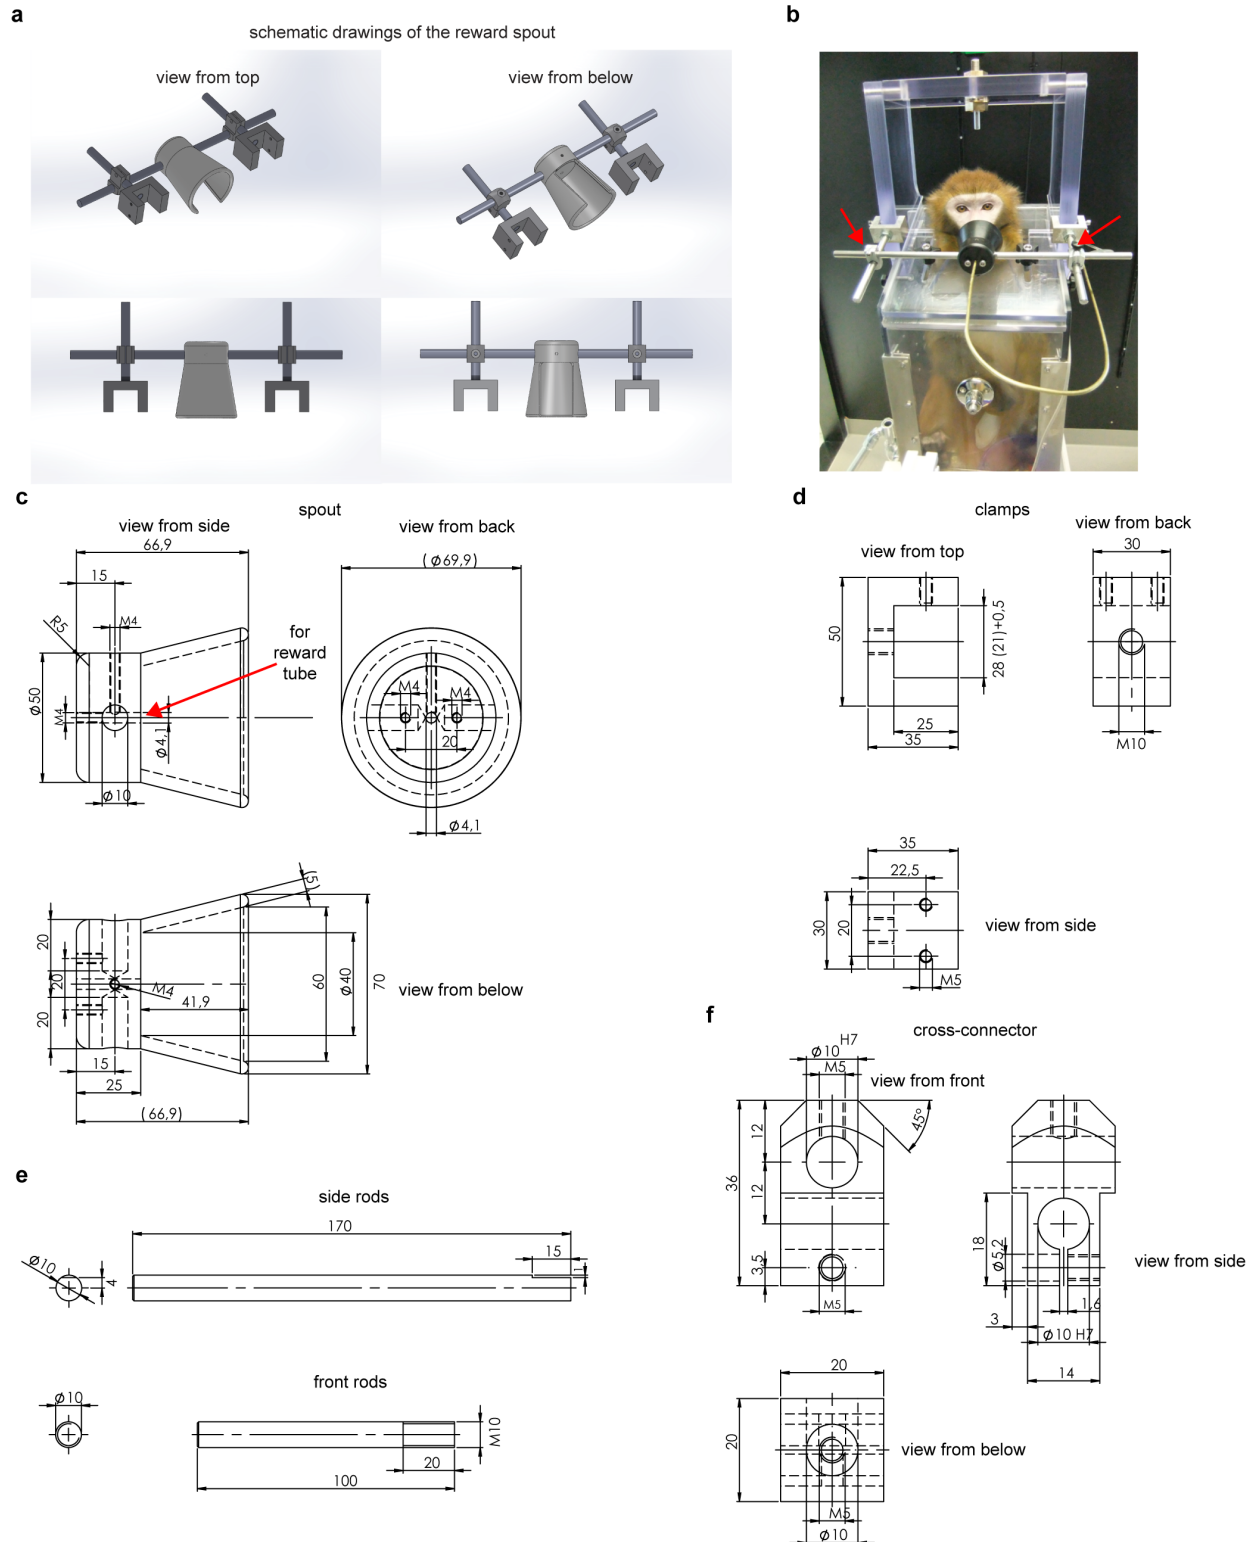

388  
 389 **Fig. 1. Design of the head-free training system.** a) Schematic overview of the spout as well  
 390 as its mounts to attach it to a conventional primate chair. b) Overview of the system while  
 391 animal A is being trained. c-f) Technical drawings of the components of the system. c) technical  
 392 drawing of the reward spout milled in one piece out of copolymer polyoxymethylene (cPOM).

393 d) technical drawing of the clamp to mount the spout to the primate chair e) technical drawings  
394 of the rods to mount the spout. f) technical drawing of the cross-connectors used to clamp the  
395 spout in position.

396  
397  
398  
399  
400  
401  
402  
403  
404

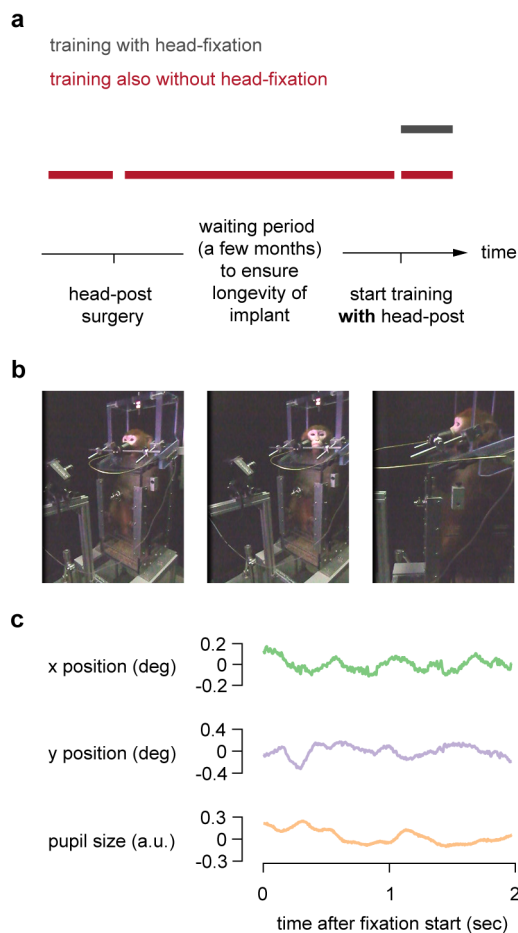

405 **Fig. 2. Overview of the approach.** a) timeline of head-free training compared to training of  
406 head-fixed animals including the period to allow for good osseointegration of the implant to the  
407 skull. b) Animal A is being trained using the head-free system. c) Example raw eye-  
408 measurements of the x and y-position and the pupil size in one trial.  
409

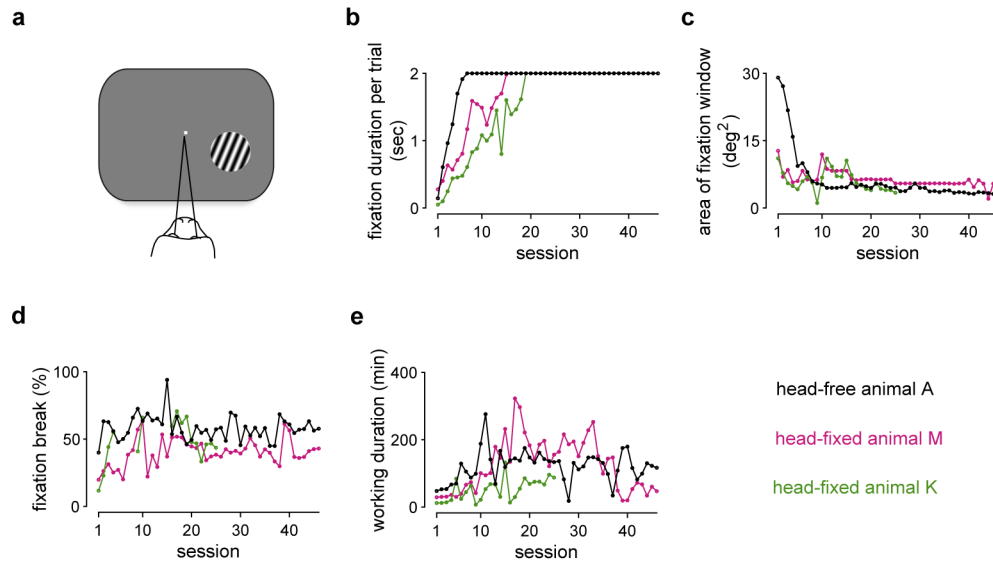

410  
411 **Fig. 3. Visual fixation training using the head-free system.** a) Schematic of the training  
412 setup with the animal fixating on the central fixation marker while a stimulus is presented  
413 peripherally. b-e) Black, pink and green data show data for head-free animal A, and head-fixed  
414 animal M and K, respectively. The full fixation-training period for head-free training in Animal A  
415 are shown, superimposed by partial fixation training in Animal M, and K. Since the training  
416 procedure after 25 sessions in animal K deviated from that in animal A and M, we only included  
417 the initial 25 sessions of fixation training in this animal. b) The average fixation duration is  
418 rapidly increased across consecutive training sessions until the fixation duration of 2 sec is  
419 reached. The progression of training of two head-fixed animals is super-imposed. c) The area of  
420 the fixation window is progressively decreased across training sessions. d) proportion fixation  
421 breaks across sessions was maintained approximately constant. (Note that in animal K eye data  
422 are only partially available.) e) The animals worked increasingly longer across sessions.

423  
424  
425



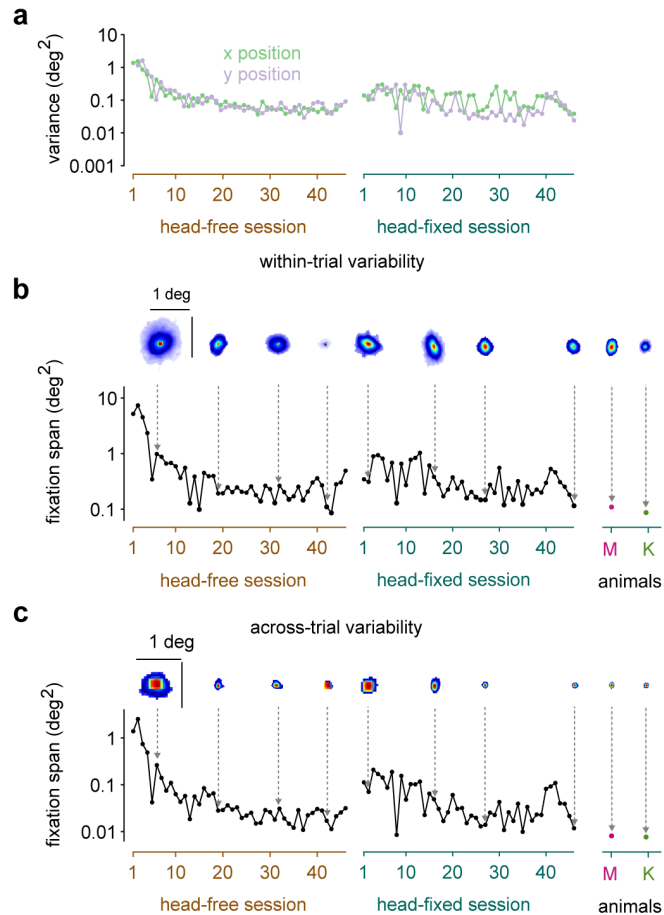

426  
427

428 **Fig. 4 Fixation precision during the fixation task.** Left, middle and right column show data for  
429 animal A when trained using the head-free system (brown abscissa), animal A when trained  
430 under head-fixation (green abscissa), and for fully trained animals M (pink) and K (green) using  
431 head-fixation, respectively. a) Variance of x (horizontal; green) and y (vertical; purple) position of  
432 the eye. Data points are horizontally jittered for visualization purpose. b) Fixation precision  
433 within each trial (b) or across trials (c) quantified as fixation span increased rapidly (smaller  
434 fixation spans) with training during the head-free sessions. Insets show the area of the central  
435 75% of the probability density functions (peak normalized for visualization, heat map with red=1)  
436 of the gaze positions used to compute the fixation span. Note the transient deterioration in  
437 fixation precision after animal A transitions to being head-fixed (middle column). For comparison  
438 the fixation precision of two additional fully trained head-fixed animals is shown (right).  
439

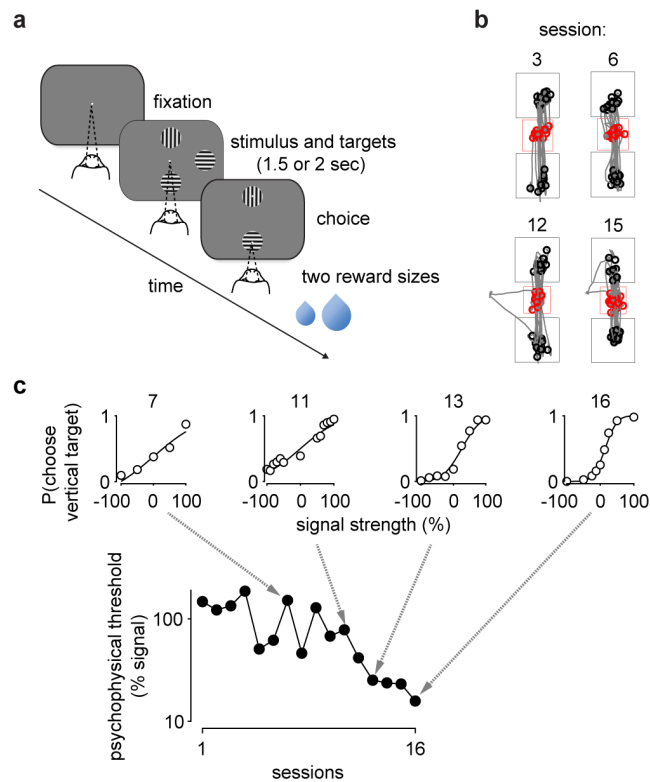

440  
441 **Fig. 5. Head-free training on an orientation discrimination task.** a) Schematic of the  
442 orientation discrimination task. The animal initiated a trial upon fixation. The visual stimulus and  
443 the two choice targets were shown for a fixed duration (typically 2 sec). Once the fixation dot  
444 was off, the animal made a saccade to one of the targets and received a liquid reward for  
445 correct choices. The reward size was changed in a predictable way (see Methods) to  
446 discourage guessing. b) Randomly selected choice-saccades from four sessions. Starting points  
447 of saccades are in red. End points are in black. Red and gray squares are fixation window and  
448 target window, respectively. c) Psychophysical thresholds decreased as a function of sessions,  
449 indicating that the psychophysical performance improved. Insets show example psychometric  
450 functions from four sessions.  
451

452  
453

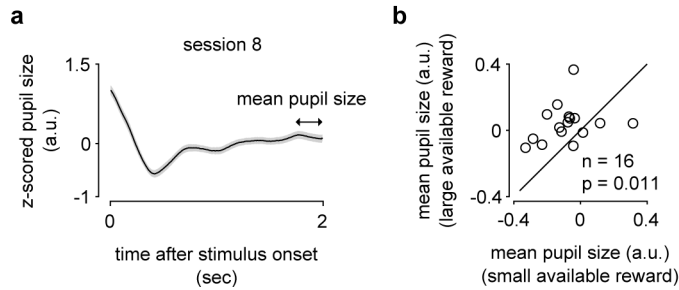

454  
455 **Fig. 6. Measurements of pupil size modulation when using the head-free system.** a) The  
456 pupil size showed a characteristic initial constriction after stimulus onset followed by a dilation  
457 towards the end of the stimulus presentation. The average time-course is shown for session 8  
458 (mean  $\pm$  SEM). b) Modulation in pupil response by available reward size. The average pupil size  
459 during the 250ms prior to stimulus offset was significantly larger on large available reward trials  
460 was larger ( $n = 16$  sessions,  $p=0.011$ ; Wilcoxon sign rank test), analogously to our previous  
461 findings using the same pupil metric in head-fixed animals (Kawaguchi et al. 2018).

462  
463  
464  
465  
466  
467

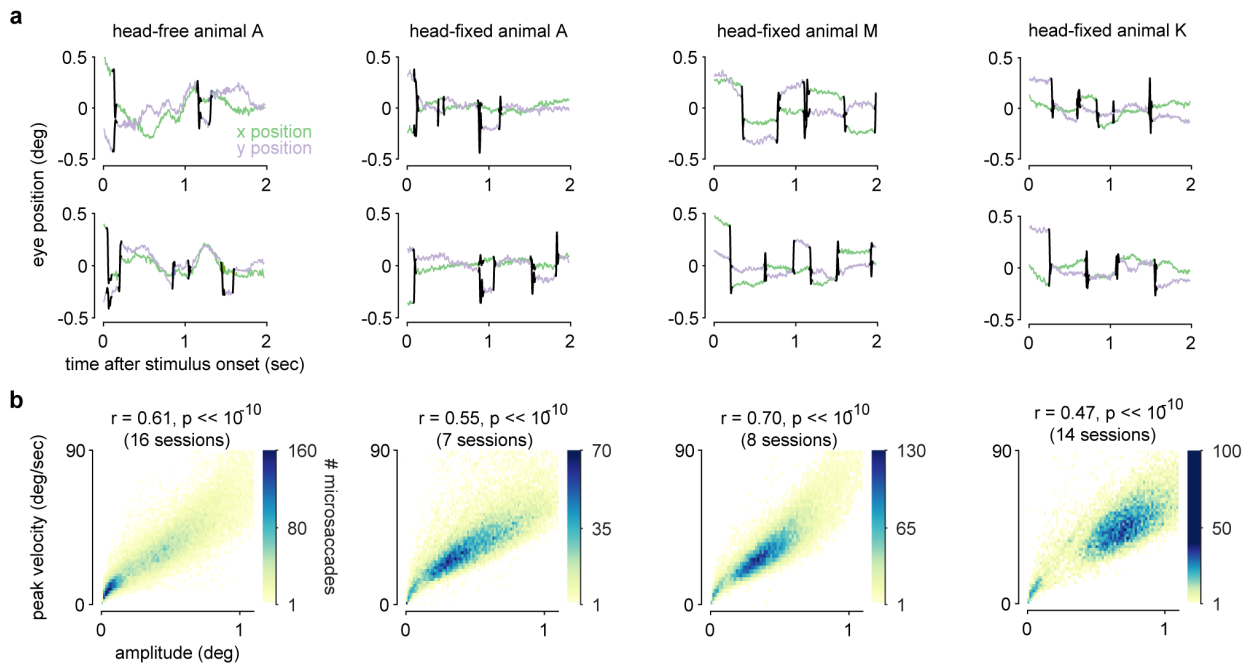

468  
469 **Fig. 7. Comparison of microsaccades between the head-free and head-fixed animals** The  
470 left two columns show data for animal A for head-free and head-fixed task performance,  
471 respectively. The third and fourth column show data for head-fixed animals M and K during task  
472 performance, respectively. a) Example eye traces with labeled microsaccades (black) for two  
473 example trials. b) The characteristic relationship between microsaccade amplitude and peak  
474 velocity was also found in animal A in the head-free condition, similar to the head-fixed animals.

475

476 Author contributions

477 K.K, L.S, P.P, and S.C performed data collection. K.K analyzed data. H.N conceived of the  
478 head-free system and supervised the project. K.K and H.N wrote the paper.

479

480 Acknowledgements

481 This work was supported by a Starting Independent Researcher grant to H.N. from the  
482 European Research Council (NEUROOPTOGEN), by funds from the Deutsche  
483 Forschungsgemeinschaft awarded to the Centre for Integrative Neuroscience (DFG EXC 307).  
484 We are grateful to the animal care staff for all their husbandry expertise and Klaus Vollmer at  
485 the workshop in the UKT (Universitätsklinikum Tübingen) for excellent support designing  
486 and building the head-free system.

487

488

- 489 References
- 490 Adams, DL, Economides, JR, Jocson, CM, Horton, JC, 2007, "A biocompatible titanium headpost for  
491 stabilizing behaving monkeys." *J Neurophysiol* **98**(2) 993–1001
- 492 Amemori, S, Amemori, K, Cantor, ML, Graybiel, AM, 2015, "A non-invasive head-holding device for  
493 chronic neural recordings in awake behaving monkeys." *J Neurosci Methods* **240**(154–160
- 494 Bellet, ME, Bellet, J, Nienborg, H, Hafed, ZM, Berens, P, 2019, "Human-level saccade detection  
495 performance using deep neural networks." *J Neurophysiol* **121**(2) 646–661
- 496 Betelak, KF, Margiotti, EA, Wohlford, ME, Suzuki, DA, 2001, "The use of titanium implants and  
497 prosthodontic techniques in the preparation of non-human primates for long-term neuronal recording  
498 studies." *J Neurosci Methods* **112**(1) 9–20
- 499 Brainard, DH, 1997, "The Psychophysics Toolbox." *Spat Vis* **10**(4) 433–436
- 500 Chen, CY, Hafed, ZM, 2013, "Postmicrosaccadic enhancement of slow eye movements." *J Neurosci*  
501 **33**(12) 5375–5386
- 502 Cherici, C, Kuang, X, Poletti, M, Rucci, M, 2012, "Precision of sustained fixation in trained and untrained  
503 observers." *J Vis* **12**(6)
- 504 Clery, S, Cumming, BG, Nienborg, H, 2017, "Decision-related activity in macaque V2 for fine disparity  
505 discrimination is not compatible with optimal linear read-out." *J Neurosci* **37**(3) 715–725
- 506 De Luna, P, Mohamed Mustafar, MF, Rainer, G, 2014, "A MATLAB-based eye tracking control system  
507 using non-invasive helmet head restraint in the macaque." *J Neurosci Methods* **235**(41–50
- 508 Drucker, CB, Carlson, ML, Toda, K, DeWind, NK, Platt, ML, 2015, "Non-invasive primate head restraint  
509 using thermoplastic masks." *J Neurosci Methods* **253**(90–100
- 510 Ebitz, RB, Platt, ML, 2015, "Neuronal activity in primate dorsal anterior cingulate cortex signals task  
511 conflict and predicts adjustments in pupil-linked arousal." *Neuron* **85**(3) 628–640
- 512 Engbert, R, Kliegl, R, 2003, "Microsaccades uncover the orientation of covert attention." *Vision Res* **43**(9)  
513 1035–1045
- 514 Engbert, R, Mergenthaler, K, 2006, "Microsaccades are triggered by low retinal image slip." *Proc Natl*  
515 *Acad Sci U S A* **103**(18) 7192–7197
- 516 Fairhall, SJ, Dickson, CA, Scott, L, Pearce, PC, 2006, "A non-invasive method for studying an index of  
517 pupil diameter and visual performance in the rhesus monkey." *J Med Primatol* **35**(2) 67–77
- 518 Herrington, TM, Masse, NY, Hachmeh, KJ, Smith, JE, Assad, JA, Cook, EP, 2009, "The effect of  
519 microsaccades on the correlation between neural activity and behavior in middle temporal, ventral  
520 intraparietal, and lateral intraparietal areas." *J Neurosci* **29**(18) 5793–5805
- 521 Kawaguchi, K, Clery, S, Pourriahi, P, Seillier, L, Haefner, RM, Nienborg, H, 2018, "Differentiating between  
522 Models of Perceptual Decision Making Using Pupil Size Inferred Confidence." *J Neurosci* **38**(41) 8874–  
523 8888
- 524 Kleiner, M, Brainard, DH, Pelli, DG, 2007, "What's new in Psychtoolbox-3?" *Perception* **36**(ECP Abstract  
525 Supplement
- 526 Lowet, E, Gomes, B, Srinivasan, K, Zhou, H, Schafer, RJ, Desimone, R, 2018, "Enhanced Neural  
527 Processing by Covert Attention only during Microsaccades Directed toward the Attended Stimulus."  
528 *Neuron* **99**(1) 207–214.e3
- 529 Lueckmann, JM, Macke, JH, Nienborg, H, 2018, "Can serial dependencies in choices and neural activity  
530 explain choice probabilities" *J Neurosci* **38**(4) 3495–3506

- 531 Machado, CJ, Nelson, EE, 2011, "Eye-tracking with nonhuman primates is now more accessible than  
532 ever before." *Am J Primatol* **73**(6) 562–569
- 533 McFarland, JM, Bondy, AG, Saunders, RC, Cumming, BG, Butts, DA, 2015, "Saccadic modulation of  
534 stimulus processing in primary visual cortex." *Nat Commun* **6**(8110)
- 535 Mitz, AR, Chacko, RV, Putnam, PT, Rudebeck, PH, Murray, EA, 2017, "Using pupil size and heart rate to  
536 infer affective states during behavioral neurophysiology and neuropsychology experiments." *J Neurosci*  
537 *Methods* **279**(1–12)
- 538 Nienborg, H, Cumming, BG, 2009, "Decision-related activity in sensory neurons reflects more than a  
539 neuron's causal effect." *Nature* **459**(7243) 89–92
- 540 Nienborg, H, Cumming, BG, 2014, "Decision-related activity in sensory neurons may depend on the  
541 columnar architecture of cerebral cortex." *J Neurosci* **34**(10) 3579–3585
- 542 Pelli, DG, 1997, "The VideoToolbox software for visual psychophysics: transforming numbers into movies."  
543 *Spat Vis* **10**(4) 437–442
- 544 Prescott, MJ, Brown, VJ, Flecknell, PA, Gaffan, D, Garrod, K, Lemon, RN, Parker, AJ, Ryder, K, Schultz,  
545 W, Scott, L, Watson, J, Whitfield, L, 2010, "Refinement of the use of food and fluid control as motivational  
546 tools for macaques used in behavioural neuroscience research: report of a Working Group of the NC3Rs."  
547 *J Neurosci Methods* **193**(2) 167–188
- 548 Roelfsema, PR, Treue, S, 2014, "Basic neuroscience research with nonhuman primates: a small but  
549 indispensable component of biomedical research." *Neuron* **82**(6) 1200–1204
- 550 Rudebeck, PH, Putnam, PT, Daniels, TE, Yang, T, Mitz, AR, Rhodes, SE, Murray, EA, 2014, "A role for  
551 primate subgenual cingulate cortex in sustaining autonomic arousal." *Proc Natl Acad Sci U S A* **111**(14)  
552 5391–5396
- 553 Ruff, DA, Alberts, JJ, Cohen, MR, 2016, "Relating normalization to neuronal populations across cortical  
554 areas." *J Neurophysiol* **116**(3) 1375–1386
- 555 Ryan, AM, Freeman, SM, Murai, T, Lau, AR, Palumbo, MC, Hogrefe, CE, Bales, KL, Bauman, MD, 2019,  
556 "Non-invasive Eye Tracking Methods for New World and Old World Monkeys" *Front Behavioral Neurosci*  
557 **13**(39)
- 558 Seillier, L, Lorenz, C, Kawaguchi, K, Ott, T, Nieder, A, Pourriahi, P, Nienborg, H, 2017, "Serotonin  
559 Decreases the Gain of Visual Responses in Awake Macaque V1." *J Neurosci* **37**(47) 11390–11405
- 560 Slater, H, Milne, AE, Wilson, B, Muers, RS, Balezeau, F, Hunter, D, Thiele, A, Griffiths, TD, Petkov, CI,  
561 2016, "Individually customisable non-invasive head immobilisation system for non-human primates with  
562 an option for voluntary engagement." *J Neurosci Methods* **269**(46–60)
- 563 Suzuki, TW, Kunitatsu, J, Tanaka, M, 2016, "Correlation between Pupil Size and Subjective Passage of  
564 Time in Non-Human Primates." *J Neurosci* **36**(44) 11331–11337
- 565 Yin, M, Borton, DA, Komar, J, Agha, N, Lu, Y, Li, H, Laurens, J, Lang, Y, Li, Q, Bull, C, Larson, L, Rosler,  
566 D, Bezard, E, Courtine, G, Nurmikko, AV, 2014, "Wireless neurosensor for full-spectrum electrophysiology  
567 recordings during free behavior." *Neuron* **84**(6) 1170–1182
- 568 Zuber, BL, Stark, L, Cook, G, 1965, "Microsaccades and the velocity-amplitude relationship for saccadic  
569 eye movements." *Science* **150**(3702) 1459–1460
- 570
